21. La Colla L, Albertin A, La Colla G, Porta A, Aldegheri G, Di Candia D, Gigli F: Predictive performance of the 'Minto' remifentanil pharmacokinetic parameter set in morbidly obese patients ensuing from a new method for calculating lean body mass. *Clin Pharmacokinet* 2010; 49:131–9
22. Anderson BJ, Holford NH: Mechanistic basis of using body size and maturation to predict clearance in humans. *Drug Metab Pharmacokinet* 2009; 24:25–36
23. Schüttler J, Kloos S, Schwilden H, Stoeckel H: Total intravenous anaesthesia with propofol and alfentanil by computer-assisted infusion. *Anaesthesia* 1988; 43(suppl):2–7
24. Glass PS, Shafer S, Reves JG: Intravenous drug delivery systems, *Miller's Anesthesia*. Edited by Miller RD. Philadelphia, Pennsylvania, Elsevier (Churchill Livingstone), 2005, pp 439–480.
25. Absalom AR, Mani V, De Smet T, Struys MM: Pharmacokinetic models for propofol: Defining and illuminating the devil in the detail. *Br J Anaesth* 2009; 103:26–37
26. Davis PJ, Stiller RL, Wilson AS, McGowan FX, Egan TD, Muir KT: In vitro remifentanil metabolism: The effects of whole blood constituents and plasma butyrylcholinesterase. *Anesth Analg* 2002; 95:1305–7, table of contents
27. Anderson BJ, Holford NH, Woollard GA, Chan PL: Paracetamol plasma and cerebrospinal fluid pharmacokinetics in children. *Br J Clin Pharmacol* 1998; 46:237–43
28. Minto CF, Schnider TW, Gregg KM, Henthorn TK, Shafer SL: Using the time of maximum effect site concentration to combine pharmacokinetics and pharmacodynamics. *ANESTHESIOLOGY* 2003; 99:324–33

## ANESTHESIOLOGY REFLECTIONS FROM THE WOOD LIBRARY-MUSEUM

### Two Cents' Worth from “Pain Killer” Makers Perry Davis & Son

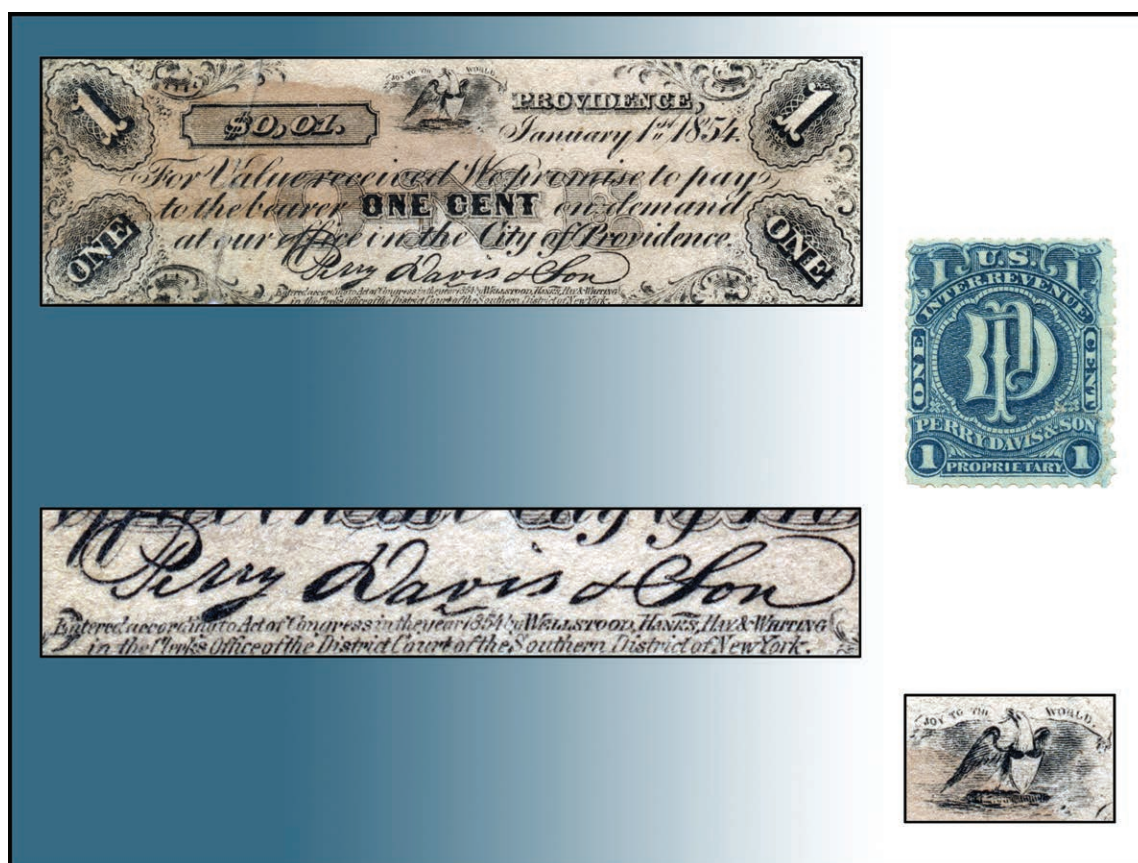

When you reach for a “painkiller,” remember to thank New England manufacturers Perry Davis (1791 to 1862) and then his son Edmund (1824 to 1880) for the older Davis’s 1839 formulation of “Vegetable Pain-Killer.” By 1854 from Providence, Rhode Island, “Perry Davis & Son” (*lower left*) had become so prosperous that they were issuing one-cent paper notes (*upper left*) and one-cent revenue stamps (*upper right*). An ordained minister, Rev. Davis generously donated his “Pain Killer” to religious missions in China, India, and around the globe. From these religious outposts, dedicated missionaries promoted temperance and decried the evils of alcohol and opium. And what was this Davis-donated “Joy to the World” (*lower right*), the “Pain Killer” that many missionaries were distributing? Why, it was a heavily alcoholic herbal elixir that was laced with opium.... (Copyright © the American Society of Anesthesiologists’ Wood Library-Museum of Anesthesiology.)

George S. Bause, M.D., M.P.H., Honorary Curator and Laureate of the History of Anesthesia, Wood Library-Museum of Anesthesiology, Schaumburg, Illinois, and Clinical Associate Professor, Case Western Reserve University, Cleveland, Ohio. UJYC@aol.com.
